# Supplementary material
Source: bioRxiv or medRxiv preprint supplement (https://www.biorxiv.org/highwire/filestream/2256/field_highwire_adjunct_files/29/008862-5.pdf)

Hoechst/AFP/FOXA2

Hoechst/SMA

Hoechst/MAP2

C3647

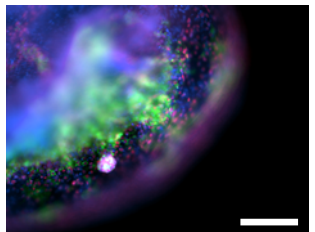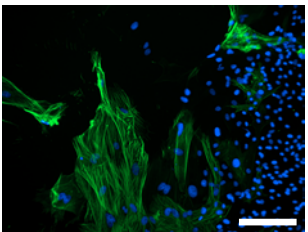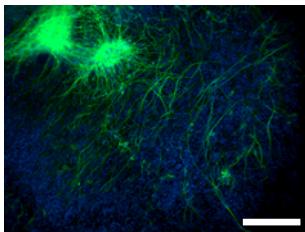

C3649

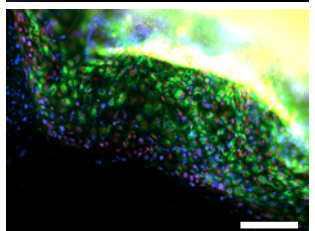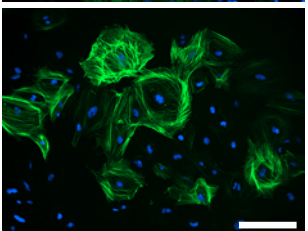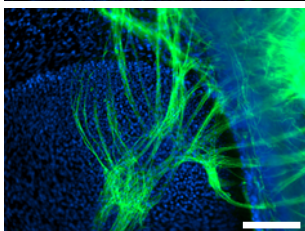

C3651

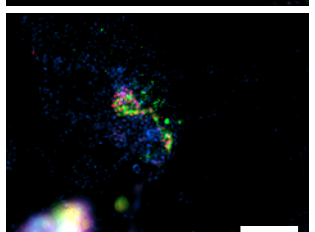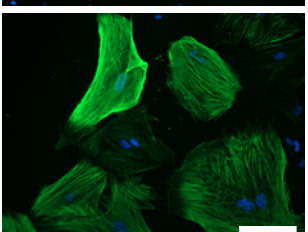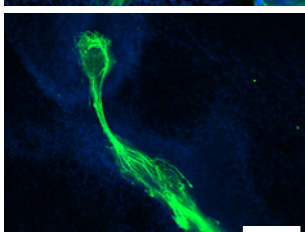

C8861

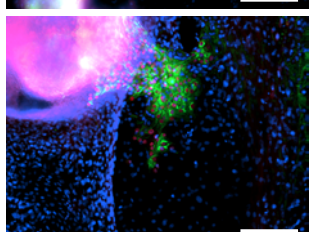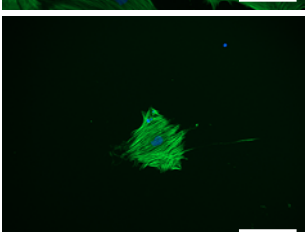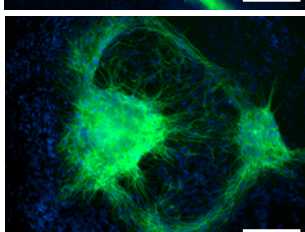

C40210

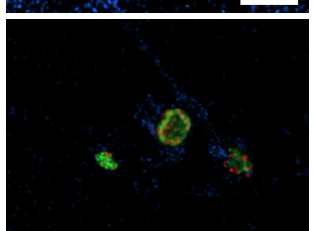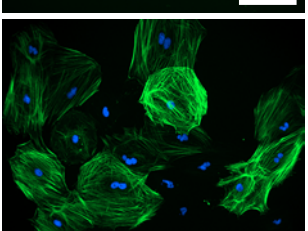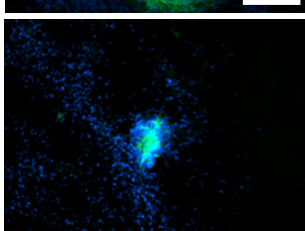

C40280

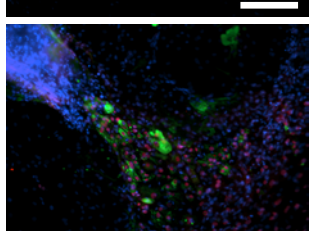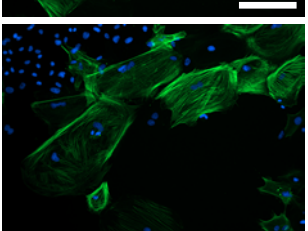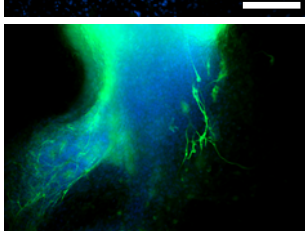

Supplement: Supplementary file [file 008862-5.pdf]
